# Supplementary material for: Suppression of Linear Ubiquitination Ameliorates Cytoplasmic Aggregation of Truncated TDP-43
Source: MDPI journal article supplement (doi:10.3390/cells11152398), 2022-08-03
Supplement: s1 [file s1]

**Supplementary Materials for**

**Suppression of Linear Ubiquitination Ameliorates Cytoplasmic**

**Aggregation of Truncated TDP-43**

*Qiang Zhang, Seigo Terawaki, Daisuke Oikawa, Yoshinori Okina, Yoshinosuke Usuki, Hidefumi Ito,  
and Fuminori Tokunaga*

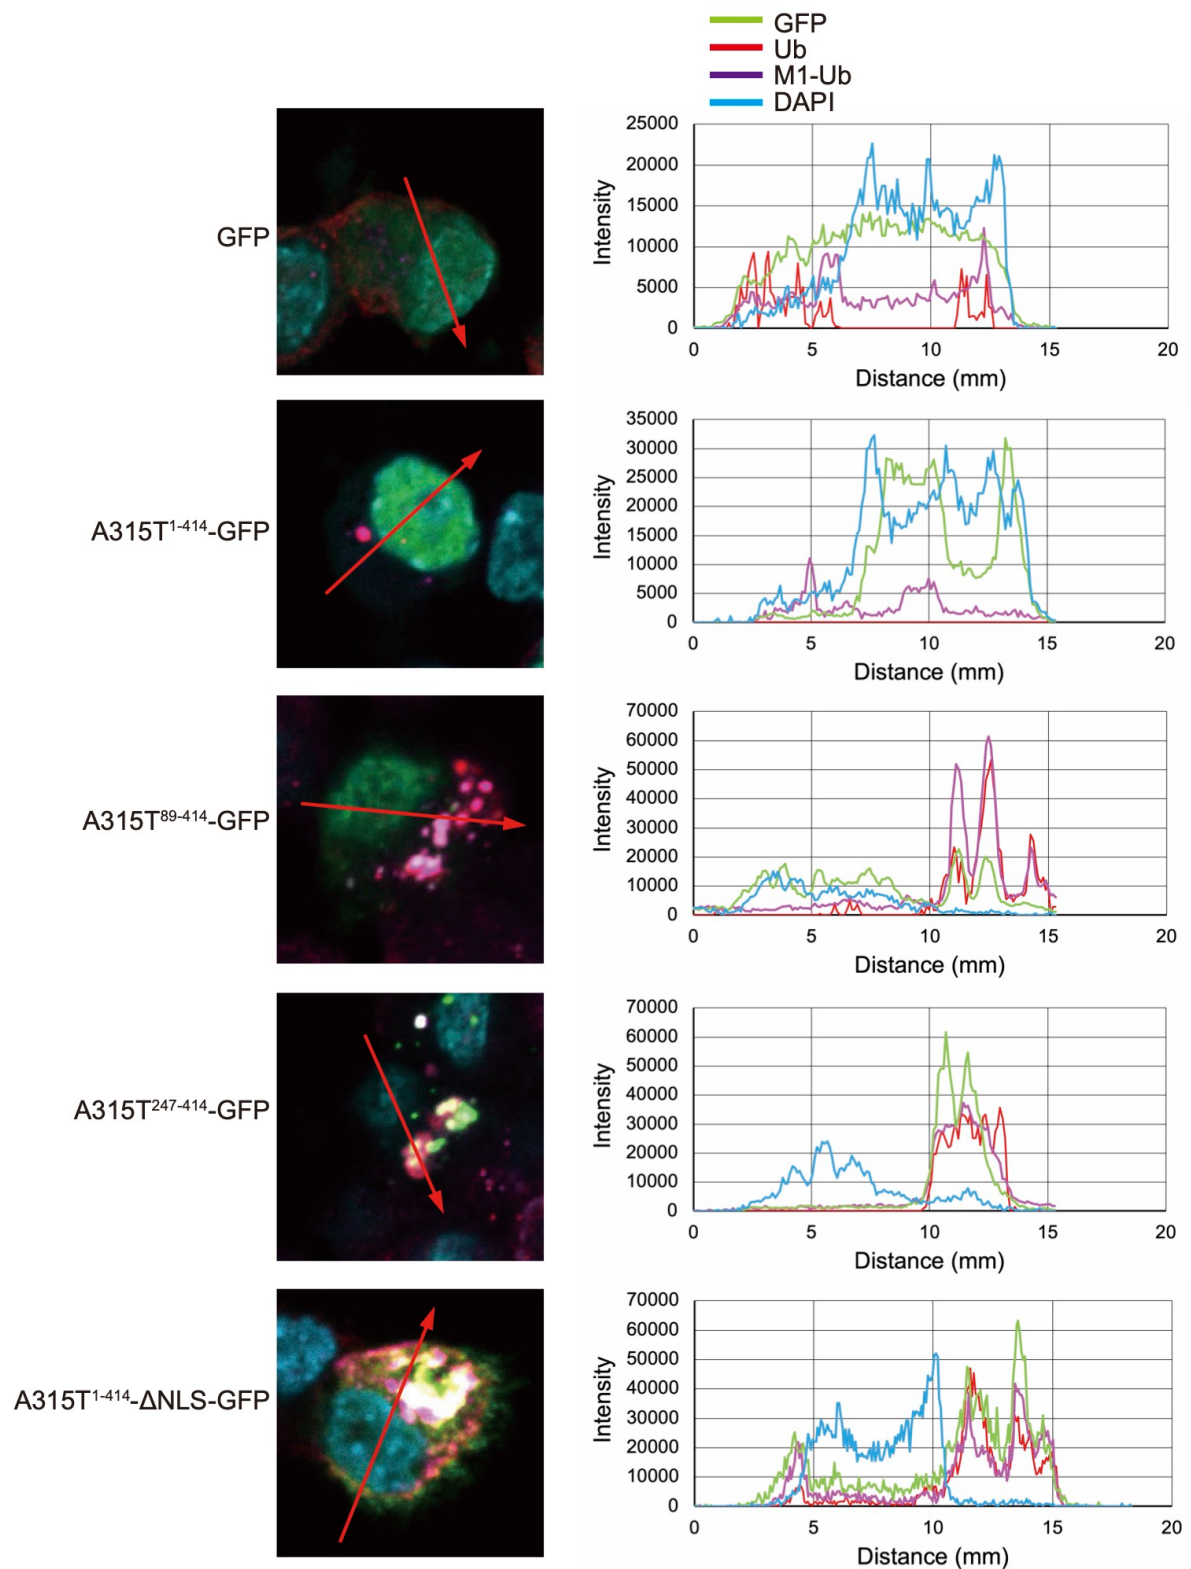

**Figure S1.** Colocalization of M1-ubiquitin and cytoplasmic aggregates of truncated TDP-43. Based on the immunofluorescent staining data shown in Figure 1B, intensity profile plots of GFP, ubiquitin (Ub), linear ubiquitin (M1-Ub), and DAPI signals on the *arrows* are quantified.

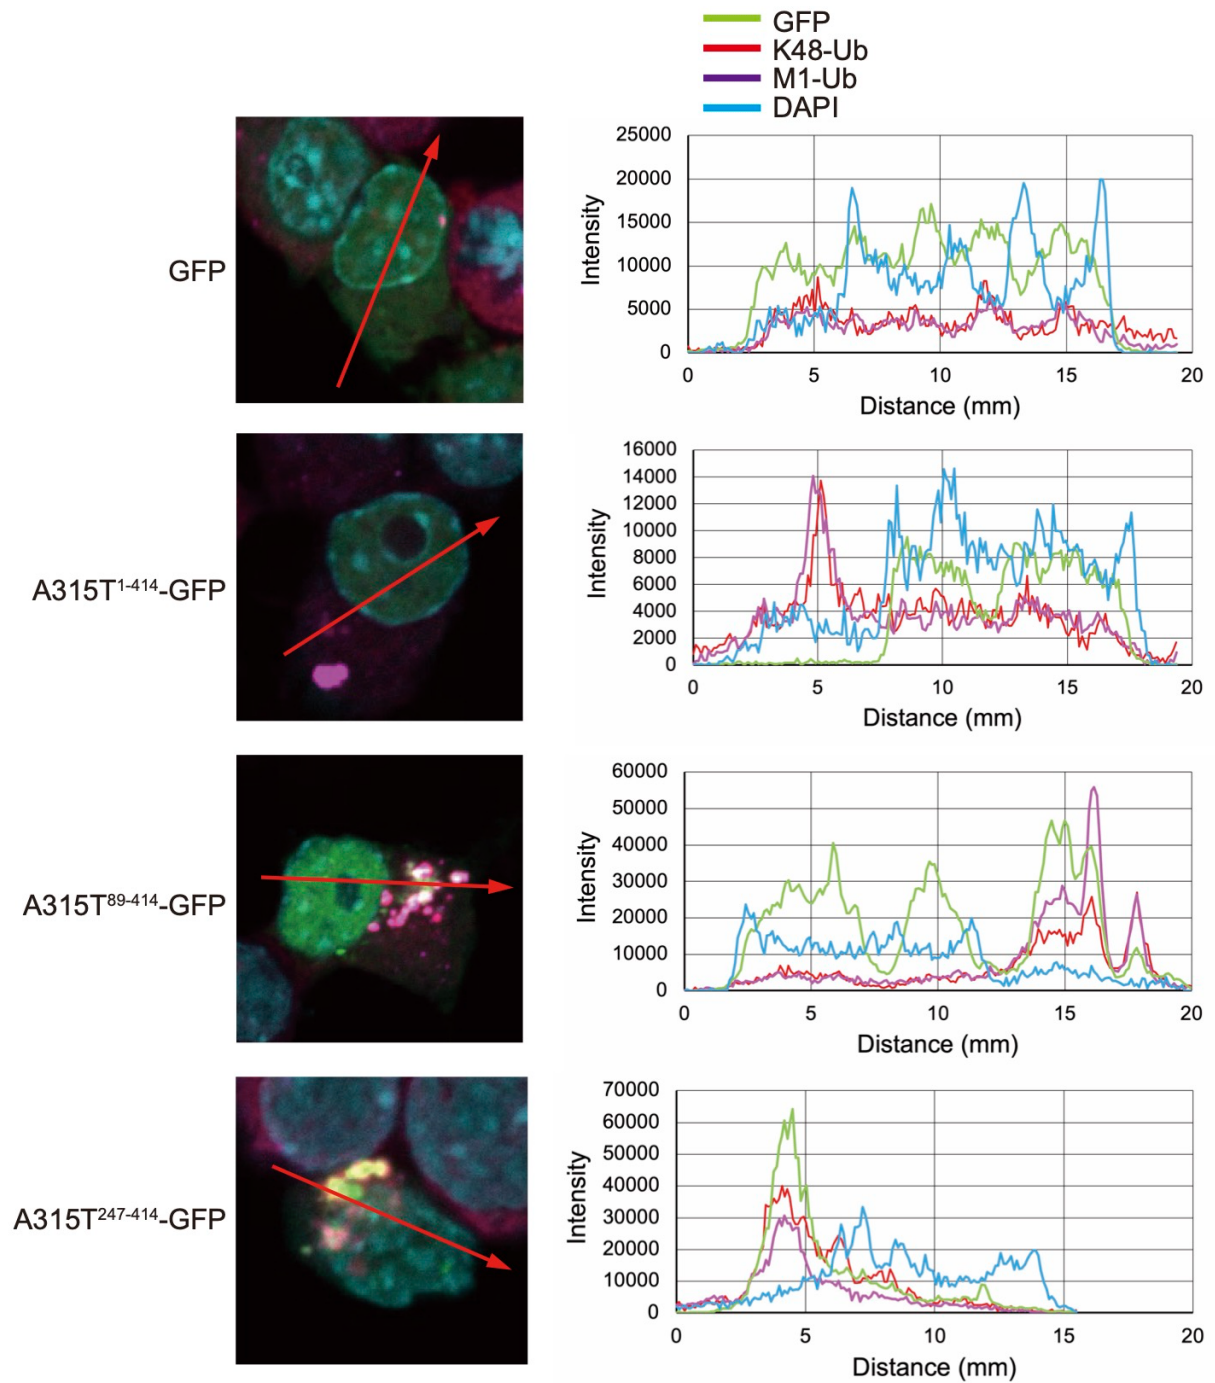

**Figure S2.** Colocalization of K48- and M1-ubiquitin on cytoplasmic aggregates of truncated TDP-43. Based on the immunofluorescent staining data shown in Figure 2A, intensity profile plots of GFP, K48-Ub, M1-Ub, and DAPI signals on the *arrows* are quantified.

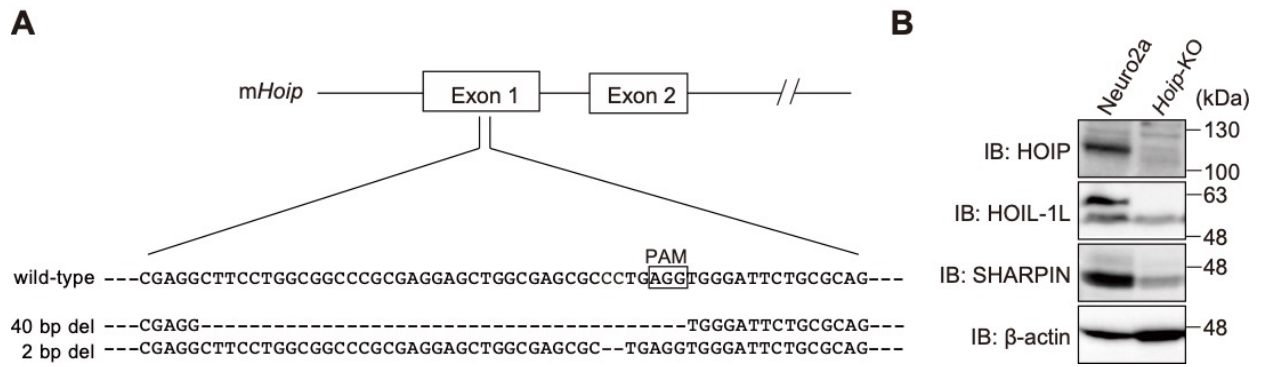

**Figure S3.** Construction of *Hoip*-KO Neuro2a cells. **(A)** Scheme for *Hoip*-KO targeting. The gRNA was employed to target exon 1 of the *Hoip* gene in Neuro2a cells. The nucleotide sequences of wild-type and the constructed *Hoip*-KO Neuro2a cells are shown. The PAM sequence is boxed. **(B)** Evaluation of *Hoip*-deficiency. Cell lysates from parental Neuro2a cells and *Hoip*-KO cells were immunoblotted with the indicated antibodies.

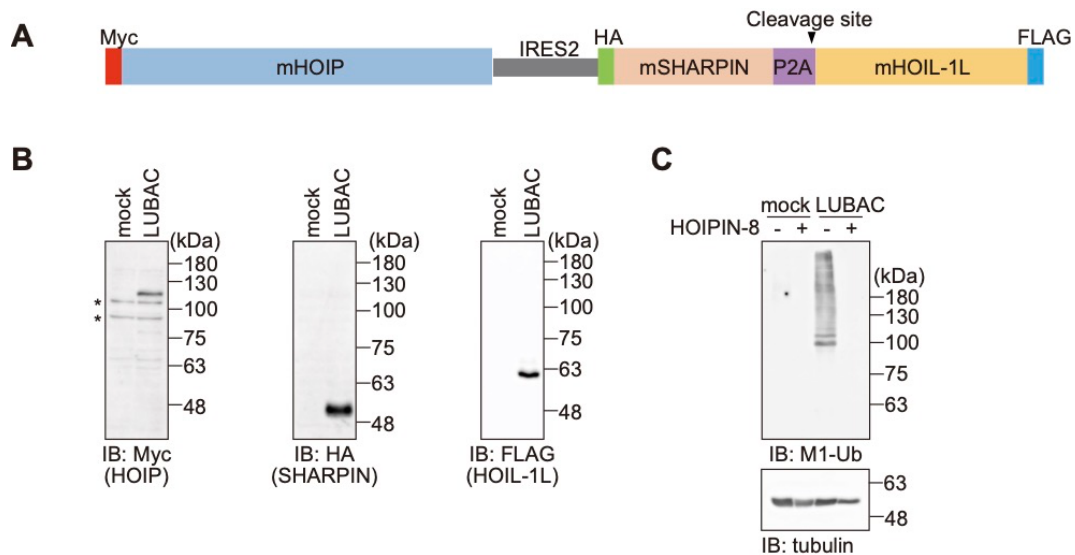

**Figure S4.** Simultaneous expression of LUBAC subunits. **(A)** Scheme for the expression vector tandemly encoding LUBAC subunits. **(B)** Confirmation of LUBAC expression. A mock or LUBAC-expressing vector was transfected into HEK293T cells, and the cell lysates were subjected to immunoblotting using the indicated antibodies. \*: non-specific signal. **(C)** Expression of LUBAC upregulates intracellular linear ubiquitin. A mock or LUBAC-expressing vector was transfected into cells, which were then treated with 10  $\mu$ M HOIPIN-8 for 20 h. The cell lysates were immunoblotted with the indicated antibodies.

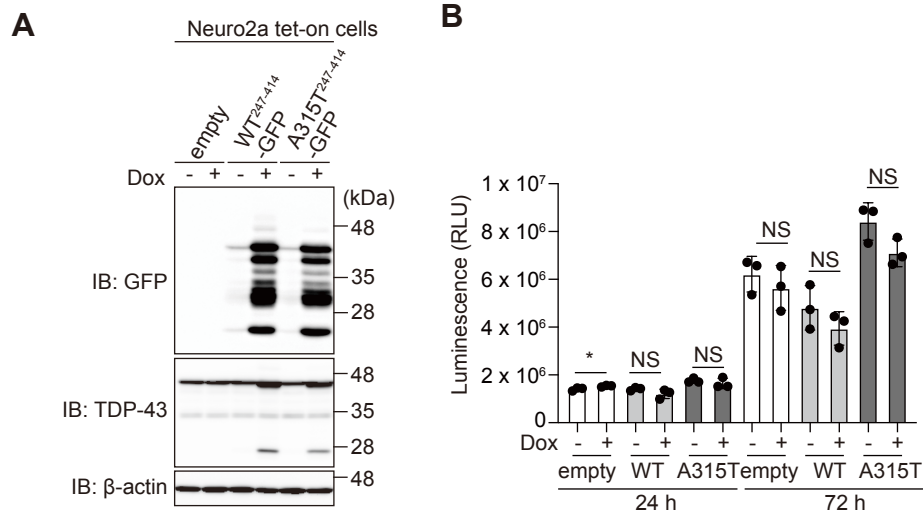

**Figure S5.** Construction of doxycycline (Dox)-inducible truncated TDP-43-expressing Neuro2a cells. **(A)** Induction of truncated TDP-43s. Neuro2a *tet*-on cells expressing empty vector, WT<sup>247-414</sup>-GFP, or A315T<sup>247-414</sup>-GFP were constructed, and cell lysates treated with or without 1  $\mu$ g/ml Dox for 24 h were immunoblotted with the indicated antibodies. **(B)** Induction of truncated TDP-43s showing the minor effects on cell viability. Neuro2a *tet*-on cells expressing empty vector, WT<sup>247-414</sup>-GFP, or A315T<sup>247-414</sup>-GFP were cultured with or without 1  $\mu$ g/ml Dox for 24 h and 72 h, and then the ATP levels were measured by using CellTiter-Glo. Data are shown as mean  $\pm$  SEM,  $n = 3$  and were evaluated by the t-test. \*:  $P < 0.05$ , NS: not significant.

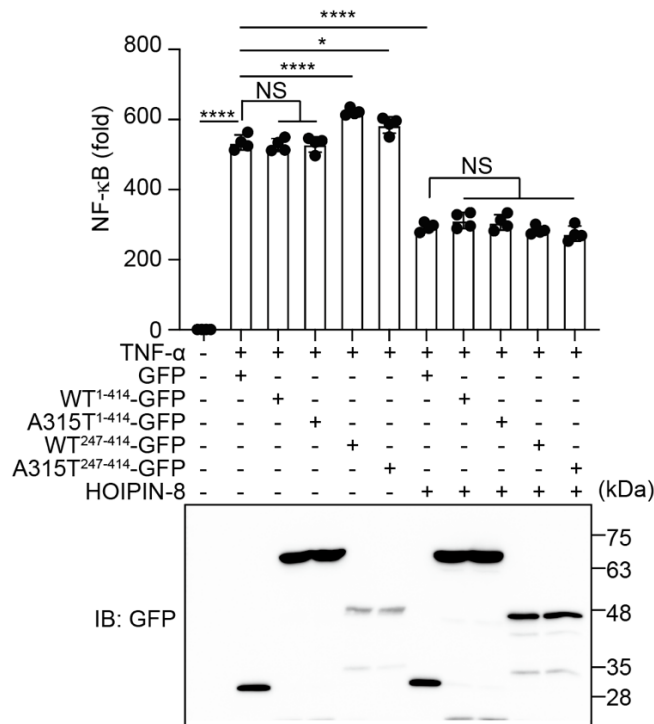

**Figure S6.** HOIPIN-8 suppresses the increased NF- $\kappa$ B activity by truncated TDP-43 in HEK293T cells. An experiment similar to that shown in Figure 7 was performed in HEK293T cells in the presence of 10 ng/ml TNF- $\alpha$ . Data are shown as mean  $\pm$  SEM,  $n = 4$ . One-way ANOVA followed by a post-hoc Tukey HSD test. \*:  $P < 0.05$ , \*\*\*\*:  $P < 0.0001$ , NS: not significant.
